# Supplementary material
Source: ML conference proceedings conference paper supplement (https://openaccess.thecvf.com/content/WACV2025/html/Ramos_No_Annotations_for_WACV_2025_paper.html)
Supplement: Supplementary file 1 [file Ramos_No_Annotations_for_WACV_2025_supplemental.pdf]

# No Annotations for Object Detection in Art through Stable Diffusion

## Supplementary Material

### A. Datasets

An overview of the two art object detection datasets, ArtDL 2.0 [2] and IconArt [1], is provided in Tab. 1. Both of the datasets consist of images of paintings containing Christian icons.

### B. WSCP training hyperparameters

We present the hyperparameters for training the lightweight MLP in the WSCP in Tab. 2.

### C. Prompts

We detail the various prompts used in NADA.

#### C.1. ZSCP

We present the prompts (choice and score) used to prompt the VLM to classify images in the ZSCP in Tab. 3.

#### C.2. Prompt construction

We present the classes, prompts, templates used in the prompt construction for image reconstruction in the class-conditioned detector.

**Class names** For each class in ArtDL, we use the title of its equivalent Wikipedia article, resulting in the following classes:

*Anthony of Padua; John the Baptist; Paul the Apostle; Francis of Assisi; Mary Magdalene; Saint Jerome; Saint Dominic; Mary, mother of Jesus; Saint Peter; Saint Sebastian*

Meanwhile for IconArt, we use the following texts for the classes:

*person* (equivalent to *Saint Sebastian*), *crucifixion of jesus*, *angel*, *mary*, *baby* (equivalent to *child jesus*), *naked person* (equivalent to *nudity*), *ruins*

**Template** By default we insert the class in the simple prompt A painting of [CLASS], where [CLASS] is the class being detected. For classes *person*, *baby*, and *naked person*, we use A painting of a [CLASS].

**Caption** We prompt the same VLM used to classify the images in NADA (with ZSCP) to instead caption the images using the prompt Describe the visual elements in the image in one sentence. Include the term "[CLASS]". If the class is not found in the caption or is located at a part of the caption that is beyond the maximum input length of the diffusion model, we prepend the caption with the prompt A painting of [CLASS]. formatted with the class name.

### D. Per-class detection results

We present the AP<sub>50</sub> per class for ArtDL 2.0 in Tab. 4. No class is detected the easiest or hardest across all experimental settings. When comparing methods, NADA (with WSCP) provides near consistent gains in AP<sub>50</sub> over NADA (with ZSCP), improving AP<sub>50</sub> in all classes except for Mary and boosting detection performance within the same class by 24.1 AP<sub>50</sub> on average. Intuitively, Oracle has the best performance across all classes.

Per-class IconArt results are provided in Tab. 5. NADA consistently detects Crucifixion of Jesus the best, but struggles to detect nudity and angel relative to other classes in all experimental settings. Furthermore, NADA (with ZSCP) outperforms NADA (with WSCP) on only four of the seven classes, with both methods having the same AP<sub>50</sub> on angel. Differences between class proposer are smaller, as NADA (with ZSCP) provides only a 1.2 AP<sub>50</sub> improvement over NADA (with WSCP). While Oracle proves the best overall AP<sub>50</sub>, it actually underperforms NADA on Crucifixion of Jesus, angel, and Mary.

### E. Qualitative analysis

In Figure 4 of the main paper, from left to right, top to bottom: samples 1, 2, 5, and 6 are from ArtDL 2.0 and samples 3, 4, 7, and 8 are from IconArt.

Table 1. Details of the evaluation datasets. ArtDL 2.0 and IconArt provide different splits for classification and detection evaluation.

|                                         | ArtDL 2.0 [2]   | IconArt [1]     |
|-----------------------------------------|-----------------|-----------------|
| Type of art                             | Paintings       | Paintings       |
| Type of objects                         | Christian icons | Christian icons |
| Num. object classes                     | 10              | 7               |
| Num. train images - classification      | 21,673          | 1,421           |
| Num. test images - classification       | 2,632           | 2,031           |
| Num. test images - detection            | 808             | 1,480           |
| Num. validation images - classification | 2,628           | 610             |
| Num. validation images - detection      | 1,625           | -               |

Table 2. Hyperparameters for training the MLP classifier in NADA (with WSCP). LR is learning rate and WD is weight decay.

| Dataset       | Layers | Classification | Loss                 | LR   | WD   | Classes |
|---------------|--------|----------------|----------------------|------|------|---------|
| ArtDL 2.0 [2] | 2      | single-label   | cross-entropy        | 1e-4 | 0    | 10      |
| IconArt [1]   | 3      | multi-label    | binary cross-entropy | 1e-3 | 1e-3 | 7       |

Table 3. Prompts used in the ZSCP of NADA (with ZSCP). [CLASSES] refers to the list of classes.

| Prompt | Dataset       | Contents                                                                                                                                                                                                                                                                                                                   |
|--------|---------------|----------------------------------------------------------------------------------------------------------------------------------------------------------------------------------------------------------------------------------------------------------------------------------------------------------------------------|
| Choice | ArtDL 2.0 [2] | Who is in the painting? Choose from the following: [CLASSES]                                                                                                                                                                                                                                                               |
| Choice | IconArt [1]   | Which of the options are in the painting? Choose from the following: [CLASSES]                                                                                                                                                                                                                                             |
| Score  | all datasets  | Which of the Christian iconographic symbols are in the painting? Choose from the following: [CLASSES] For each symbol, give a score from 0 to 1 of how confident you are. Put your answer in a dictionary first and then reason your answer. Be as accurate as possible. If none of the symbols are present, output 'None' |

Table 4. AP<sub>50</sub> for each class in ArtDL 2.0. *Mean* refers to the overall AP<sub>50</sub> reported in the main paper.

| Class Proposal   | Antony of Padua | John the Baptist | Paul | Francis | Mary Magdalene | Jerome | Dominic | Mary | Peter | Sebastian | Mean |
|------------------|-----------------|------------------|------|---------|----------------|--------|---------|------|-------|-----------|------|
| NADA (with WSCP) | 29.5            | 35.1             | 26.7 | 50.7    | 60.1           | 58.3   | 51.3    | 55.5 | 40.2  | 51.5      | 45.8 |
| NADA (with ZSCP) | 7.6             | 21.1             | 2.5  | 15.6    | 24.3           | 30.2   | 7.7     | 60.0 | 3.9   | 45.5      | 21.8 |
| Oracle           | 42.0            | 40.8             | 79.3 | 56.2    | 80.8           | 68.3   | 55.8    | 68.5 | 54.5  | 66.5      | 61.3 |

Table 5. AP<sub>50</sub> for each class in IconArt 2.0.

| Class Proposal   | Saint Sebastian | Crucifixion of Jesus | Angel | Mary | Child Jesus | Nudity | Ruins | Mean |
|------------------|-----------------|----------------------|-------|------|-------------|--------|-------|------|
| NADA (with WSCP) | 6.8             | 47.9                 | 0.4   | 15.2 | 14.0        | 3.4    | 9.1   | 13.8 |
| NADA (with ZSCP) | 11.7            | 43.1                 | 0.4   | 20.7 | 15.0        | 2.2    | 12.3  | 15.1 |
| Oracle           | 21.0            | 45.8                 | 0.3   | 20.3 | 17.5        | 5.4    | 20.3  | 18.7 |

## References

- [1] Nicolas Gonthier, Yann Gousseau, Said Ladjal, and Olivier Bonfait. Weakly supervised object detection in artworks. In *VISART Workshop at ECCV*, 2018. [1](#), [2](#)
- [2] Federico Milani, Nicolò Oreste Pincioli Vago, and Piero Fraternali. Proposals generation for weakly supervised object detection in artwork images. *J. Imaging*, 8(8), 2022. [1](#), [2](#)
